# Supplementary material for: Pathognomonic oral profile of Enamel Renal Syndrome (ERS) caused by recessive FAM20A mutations
Source: PubMed Central journal article supplement (PMC4071802; doi:10.1186/1750-1172-9-84), 2014-06-14
Supplement: 1750-1172-9-84-S1.pdf [file 1750-1172-9-84-S1.pdf]

|                                      | Number of reported |       | Age of diagnosis               | Oral phenotype              |                                    |                             |                                     |                                             |                                  |                    |                            |                            |                              |                      |                        |                    |                            | Kidney phenotype                                     | Diagnosis reported                                                                                                                                                          |
|--------------------------------------|--------------------|-------|--------------------------------|-----------------------------|------------------------------------|-----------------------------|-------------------------------------|---------------------------------------------|----------------------------------|--------------------|----------------------------|----------------------------|------------------------------|----------------------|------------------------|--------------------|----------------------------|------------------------------------------------------|-----------------------------------------------------------------------------------------------------------------------------------------------------------------------------|
|                                      | Families           | Cases |                                | Enamel hypoplasia / aplasia | Delayed eruption / unerupted teeth | Intra-pulpal calcifications | Crown resorption of unerupted teeth | Semi-lunar shaped defect of central incisor | Inter-radicular dental dysplasia | pot hypercementato | Root dilaceration          | Tooth follicle hyperplasia | Tooth follicle calcification | Gingival hyperplasia | Gingival calcification | Anterior open-bite | Eruption corridor modified | Bilateral nephrocalcinosis                           |                                                                                                                                                                             |
| MacGibbon, 1972                      | 1                  | 1     | 25y                            | +                           | +                                  | +                           | +                                   | +                                           |                                  |                    | +                          | +                          |                              |                      |                        |                    |                            | +                                                    | Generalized enamel hypoplasia and renal dysfunction.                                                                                                                        |
| Chosack et al., 1979                 | 1                  | 4     | 5y, 13y, 15y, 18y              | +                           | +                                  | +                           | +                                   |                                             |                                  |                    | +                          | +                          |                              |                      |                        |                    |                            | Not investigated                                     | Amelogenesis imperfecta among Israeli Jews and the description of a new type of local hypoplastic autosomal recessive amelogenesis imperfecta.                              |
| Lubinsky et al., 1985                | 1                  | 2     | 10y, 12y                       | +                           | +                                  | +                           | +                                   | +                                           |                                  |                    | +                          | +                          |                              |                      |                        |                    |                            | +                                                    | Syndrome of amelogenesis imperfecta, nephrocalcinosis, impaired renal concentration, and possible abnormality of calcium metabolism.                                        |
| Nakata et al., 1985                  | 1                  | 2     | 13y,12y                        | +                           | +                                  |                             | +                                   | +                                           | +                                |                    | +                          | +                          | +                            | +                    |                        |                    |                            | Not investigated                                     | Inter-radicular dentin dysplasia associated with amelogenesis imperfecta.                                                                                                   |
| Ooya et al., 1988                    | 1                  | 1     | 12y                            | +                           | +                                  | +                           | +                                   | +                                           |                                  |                    |                            |                            | +                            | +                    |                        |                    |                            | Not investigated                                     | Autosomal recessive rough hypoplastic amelogenesis imperfecta. A case report with clinical, light microscopic, radiographic, and electron microscopic observations.         |
| Van Heerden et al., 1990             | 2                  | 2     | 14y; 26y                       | +                           | +                                  | +                           | -                                   |                                             | +                                | +                  | +                          | +                          | +                            |                      |                        |                    |                            | Not investigated                                     | Amelogenesis imperfecta: multiple impactions associated with odontogenic fibromas (WHO) type.                                                                               |
| Peters et al., 1992                  | 1                  | 1     | 26y                            | +                           | +                                  | +                           | +                                   |                                             |                                  |                    | +                          | +                          | +                            | +                    |                        |                    |                            | Not investigated                                     | Rough hypoplastic amelogenesis imperfecta with follicular hyperplasia.                                                                                                      |
| Hall et al., 1995                    | 1                  | 2     | 10y6m, 14y8m                   | +                           | +                                  | +                           | +                                   | +                                           |                                  |                    | +                          | -                          | +                            |                      |                        |                    |                            | +                                                    | Amelogenesis imperfecta and nephrocalcinosis syndrome. Case studies of clinical features and ultrastructure of tooth enamel in two siblings.                                |
| Phakey et al., 1995                  |                    |       |                                |                             |                                    |                             |                                     |                                             |                                  |                    |                            |                            |                              |                      |                        |                    |                            |                                                      |                                                                                                                                                                             |
| Dellow et al., 1998                  | 1                  | 2     | 8y/32y, 12/40y (dental/kidney) | +                           | +                                  | +                           | +                                   |                                             |                                  |                    |                            |                            |                              |                      |                        |                    |                            | +                                                    | Amelogenesis imperfecta, nephrocalcinosis, and hypocalciuria syndrome in two siblings from a large family with consanguineous parents.                                      |
| Raubenheimer and Noffke, 2002        | 1                  | 1     | 19y                            | Enamel dysplasia            | -                                  | -                           | -                                   |                                             |                                  |                    | COFs (no tooth associated) | COFs calcifications        |                              |                      |                        | +                  |                            | Not investigated                                     | Enamel dysplasia, hamartomas.                                                                                                                                               |
| Normand de La Tranchade et al., 2003 | 1                  | 1     | 15y                            | +                           | +                                  | +                           | +                                   | -                                           |                                  |                    | +                          | +                          | +                            |                      |                        |                    |                            | +                                                    | Amelogenesis imperfecta and nephrocalcinosis: a new case of this rare syndrome.                                                                                             |
| Paula et al., 2005                   | 1                  | 1     | 13y                            | +                           | +                                  | +                           | -                                   | +                                           |                                  |                    | +                          | +                          | +                            |                      |                        |                    |                            | +                                                    | Case report of a rare syndrome associating amelogenesis imperfecta and nephrocalcinosis in a consanguineous family.                                                         |
| Cetrullo et al., 2006                | 1                  | 2     | 18y,14y                        | +                           | -                                  | -                           | -                                   |                                             |                                  |                    | -                          | -                          | -                            |                      |                        | +                  |                            | +                                                    | Two cases of familial hypomagnesemia with hypercalciuria and nephrocalcinosis: dental findings.                                                                             |
| Feller et al., 2006                  | 1                  | 1     | 12y                            | +                           | +                                  | +                           |                                     | -                                           |                                  |                    | +                          | +                          | +                            | +                    | +                      |                    |                            | Not investigated                                     | Enamel dysplasia with odontogenic fibroma-like hamartomas: review of the literature and report of a case.                                                                   |
| Fu et al., 2006                      | 1                  | 1     | 14y                            | +                           | -                                  |                             | -                                   |                                             |                                  |                    |                            |                            |                              | -                    |                        |                    |                            | +                                                    | Enamel-renal syndrome associated with hypokalaemic metabolic alkalosis and impaired renal concentration: a novel syndrome?                                                  |
| Elisabeth et al., 2007               | 2                  | 2     | 23y; 20y                       | +                           | +                                  | +                           | +                                   |                                             |                                  |                    | +                          | +                          |                              | -                    |                        |                    |                            | +                                                    | Amelogenesis imperfecta with renal disease—a report of two cases.                                                                                                           |
| Feller et al., 2008                  | 1                  | 1     | 20y                            | +                           | +                                  | +                           |                                     |                                             |                                  | +                  | +                          | +                          | +                            | +                    | +                      | +                  |                            | Not investigated                                     | Enamel dysplasia hamartomatous atypical follicular hyperplasia: review of the literature and report of a case.                                                              |
| Roquebert et al., 2008               | 1                  | 1     | 10y                            | +                           | +                                  | +                           | +                                   |                                             | +                                | +                  | +                          | +                          | +                            | +                    | +                      | +                  |                            | Not investigated                                     | Amelogenesis imperfecta, rough hypoplastic type, dental follicular hamartomas and gingival hyperplasia: report of a case from Central America and review of the literature. |
| Martelli-Junior et al., 2008         | 1                  | 4     | 19,13y,13y,18y                 | +                           | +                                  | +                           | +                                   | +                                           |                                  |                    | +                          | +                          | +                            | +                    |                        |                    |                            | No history of renal pathology (but not investigated) | Case reports of a new syndrome associating gingival fibromatosis and dental abnormalities in a consanguineous family.                                                       |
| Martelli-Junior et al., 2011         | 1                  | 1     | 9y                             | +                           | +                                  | +                           |                                     | +                                           |                                  |                    | +                          |                            | +                            |                      |                        |                    |                            | +                                                    | Amelogenesis imperfecta and nephrocalcinosis syndrome: a case report and review of the literature.                                                                          |
| Dos Santos et al., 2011              | 1 <sup>1</sup>     | 4     | 20y,15y,15y,20y                | +                           | +                                  | +                           | +                                   |                                             |                                  |                    | +                          | +                          | +                            | +                    |                        | +                  |                            | Not investigated                                     | Imaging evaluation of the gingival fibromatosis and dental abnormalities syndrome.                                                                                          |
| Cho et al., 2011                     | 4                  | 4     |                                | +                           | +                                  | +                           |                                     | +                                           |                                  |                    | +                          | +                          | +                            |                      |                        |                    |                            | Not investigated                                     | Novel FAM20A mutations in hypoplastic amelogenesis imperfecta.                                                                                                              |
| Kala Vani et al., 2012               | 1                  | 1     | 11y                            | +                           | +                                  |                             | -                                   |                                             |                                  |                    | +                          |                            | -                            |                      |                        | +                  |                            | +                                                    | Enamel renal syndrome: a rare case report.                                                                                                                                  |
| Hegde et al., 2012                   | 1                  | 2     | 20y, 17y                       | +                           | +                                  | +                           | +                                   | +                                           | +                                |                    | +                          | +                          | +                            |                      |                        |                    |                            | +                                                    | Multiple Unerupted Teeth with Amelogenesis Imperfecta in Siblings                                                                                                           |
| O'Sullivan et al., 2012              | 1 <sup>1</sup>     | 4     | 19y,13y,13y,18y                | +                           | +                                  | +                           | +                                   | +                                           |                                  |                    | +                          | +                          | +                            | +                    |                        |                    |                            | Not investigated                                     | Whole-Exome sequencing identifies FAM20A mutations as a cause of amelogenesis imperfecta and gingival hyperplasia syndrome.                                                 |
| Jaureguiberry et al., 2012           | 16 <sup>2</sup>    | 25    | from 12y to 64y                | +                           | +                                  | +                           | +                                   | +                                           |                                  |                    | +                          | +                          | +                            | +                    |                        | +                  |                            | +                                                    | Nephrocalcinosis (Enamel Renal Syndrome) caused by autosomal recessive FAM20A                                                                                               |
| Wang et al., 2013                    | 3                  | 5     |                                | +                           | +                                  | +                           | +                                   | +                                           | +                                |                    | +                          | +                          | +                            | +                    |                        | +                  |                            | +                                                    | FAM20A Mutations Can Cause Enamel-Renal Syndrome (ERS)                                                                                                                      |
| Cabral et al., 2013                  | 1                  | 12    | N.A.                           | +                           | +                                  |                             |                                     |                                             |                                  |                    |                            |                            | +                            |                      |                        |                    |                            | +                                                    | Autosomal recessive gingival hyperplasia and dental anomalies caused by a 29-base pair duplication in the FAM20A gene                                                       |
| Wang et al. (b), 2013                | 2                  | 3     | 12y; 10y                       | +                           | +                                  | +                           | +                                   | +                                           |                                  |                    | +                          | +                          | +                            | +                    |                        | +                  |                            | +                                                    | +(1/2) Neg. US in proband of Family 1<br>FAM20A Mutations Associated with Enamel Renal Syndrome                                                                             |
| Kantaputra et al., 2013              | 2                  | 2     | 14y; 10y                       | +                           | +                                  | +                           | +                                   | +                                           |                                  |                    | +                          | +                          | +                            | +                    |                        | +                  |                            | +                                                    | Enamel-Renal-Gingival Syndrome and FAM20A Mutations                                                                                                                         |

COF: Central Odontogenic Fibroma

Neg. US: Negative ultrasounds analysis

<sup>1</sup>: Family previously described in Martelli-Junior et al., 2008

<sup>2</sup>: Two families were previously described (Dellow et al, 1998; Paula et al., 2005)

<sup>3</sup>: Family sequenced in Jaureguiberry et al., 2012

<sup>4</sup>: Family sequenced in O'Sullivan et al., 2012
